# Supplementary material for: Damage identification of bridge structures based on extended Kalman filter algorithm without prior knowledge of road roughness and moving vehicle
Source: Research Square preprint supplement (doi:10.21203/rs.3.rs-2030952/v1), 2022-09-08
Supplement: Supplementary file 1 [file 72e415278d27d0db9eb2643e.docx]

**Appendix 1**

(42a)

where

(43a)

(44a)

(45a)

**Appendix 2**

Jacobian matrix：

(46a)

**Appendix 3**

(47a)

where：

(48a)

(49a)

(50a)

where

(51a)

(52a)

(53a)

sensitivity matrix of the corresponding feature matrix:

(54a)

(55a)

**Appendix 4**

Jacobian matrix：

(56a)

where

(57a)
